# Supplementary material
Source: PubMed Central journal article supplement (PMC4134722)
Supplement: NIHMS579211-supplement-supplement_1.pdf [file NIHMS579211-supplement-supplement_1.pdf]

## ADDITIONAL SUPPORTING INFORMATION

**Supporting table 1: Risk ratios for the association of breast tumour receptor status with residential distance of breast cancer patients from Chris Hani Baragwanath Academic Hospital.**

| Distance to hospital (km)          | <i>RR for oestrogen-negative tumour</i> |                   | <i>RR for progesterone-negative tumour</i> |                   | <i>RR for HER2-positive tumour</i> |                   |
|------------------------------------|-----------------------------------------|-------------------|--------------------------------------------|-------------------|------------------------------------|-------------------|
|                                    | RR <sup>b</sup>                         | 95% CI            | RR <sup>b</sup>                            | 95% CI            | RR <sup>b</sup>                    | 95% CI            |
| < 5 km                             | 1                                       | -                 | 1                                          | -                 | 1                                  | -                 |
| 5 - 9.9                            | 0.93                                    | 0.71, 1.21        | 0.98                                       | 0.80, 1.20        | 1.25                               | 0.89, 1.75        |
| 10 - 19.9                          | 1.07                                    | 0.82, 1.41        | 1.00                                       | 0.81, 1.24        | 0.94                               | 0.64, 1.38        |
| 20 - 29.9                          | 1.10                                    | 0.83, 1.46        | 1.04                                       | 0.82, 1.31        | 1.06                               | 0.71, 1.57        |
| 30 - 39.9                          | 1.16                                    | 0.80, 1.69        | 1.17                                       | 0.88, 1.56        | 1.36                               | 0.85, 2.17        |
| 40 - 99                            | 1.21                                    | 0.84, 1.73        | 1.07                                       | 0.72, 1.60        | 1.28                               | 0.70, 2.34        |
| 100+                               | 0.98                                    | 0.45, 2.11        | -                                          | -                 | -                                  | -                 |
| <i>Trend per 30 km<sup>a</sup></i> | <i>1.16</i>                             | <i>0.92, 1.46</i> | <i>1.11</i>                                | <i>0.92, 1.34</i> | <i>1.04</i>                        | <i>0.77, 1.41</i> |

<sup>a</sup> Restricted to women residing within 50 km of CHBAH

<sup>b</sup> Adjusted for age (continuous), year (continuous), race (non-black v black) and referral source (clinic, hospital, self, not known, GP).
